# Supplementary material
Source: publisher figshare collection journal article supplement (https://tandf.figshare.com/ndownloader/files/23614367)
Supplement: Supplementary file 1 [file 23614367]

**Lengend**

**Fig. S1** 1H NMR spectra of the ligand H2L.

**Fig. S2** Theinfrared spectra of H2L and its complex.


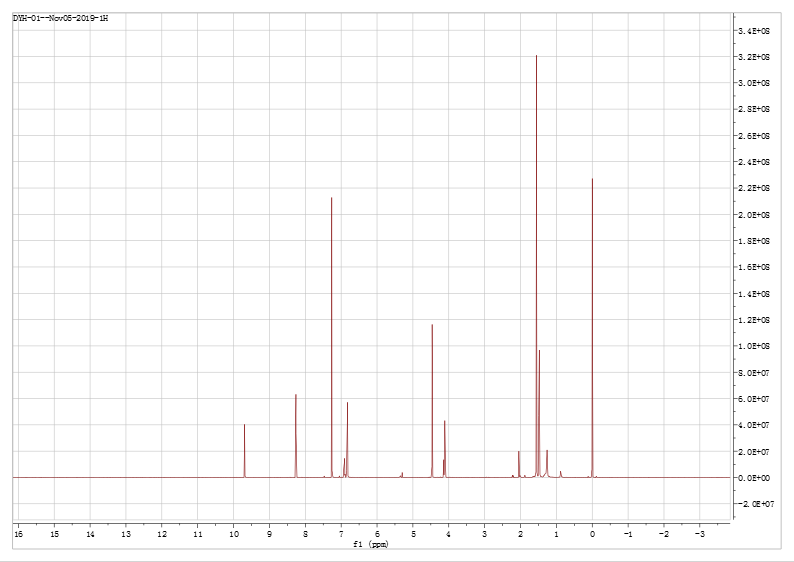


**Fig. S1**

**Fig. S2**
